# Supplementary material for: A facile synthesis of two ionized fluorescent carbon dots and selective detection toward Fe2+ and Cu2+
Source: Royal Society of Chemistry journal article supplement (doi:10.1039/d0na00151a), 2020-01-01
Supplement: d0na00151a1.pdf [file d0na00151a1.pdf]

## Supporting Information

### **Facile synthesis of two ionized fluorescent carbon dots and selective detection toward Fe<sup>2+</sup> and Cu<sup>2+</sup>**

Li Gao,<sup>a</sup> Datong Wu,<sup>\*a</sup> Wensheng Tan,<sup>b</sup> Fei Pan,<sup>a</sup> Jiale Xu,<sup>b</sup> Yongxin Tao<sup>\*a</sup> and Yong  
Kong<sup>\*a</sup>

<sup>a</sup>*Jiangsu Key Laboratory of Advanced Materials and Technology, School of  
Petrochemical Engineering, Changzhou University, Changzhou 213164, China*

<sup>b</sup>*Changzhou Key Laboratory of Large Plastic Parts Intelligence Manufacturing,  
Changzhou College of Information Technology, Changzhou, 213164, China*

<sup>\*</sup>*E-mail: wudatong@cczu.edu.cn (D. Wu); taoyx@cczu.edu.cn (Y. Tao);*

*yzkongyong@cczu.edu.cn (Y. Kong)*

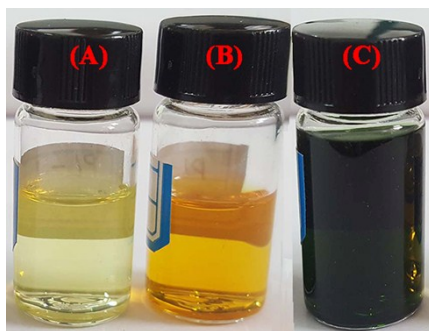

**Fig. S1** Photos of (A) CDs-1, (B) CDs-2 at room temperature, and (C) CDs-2 at 80 °C.

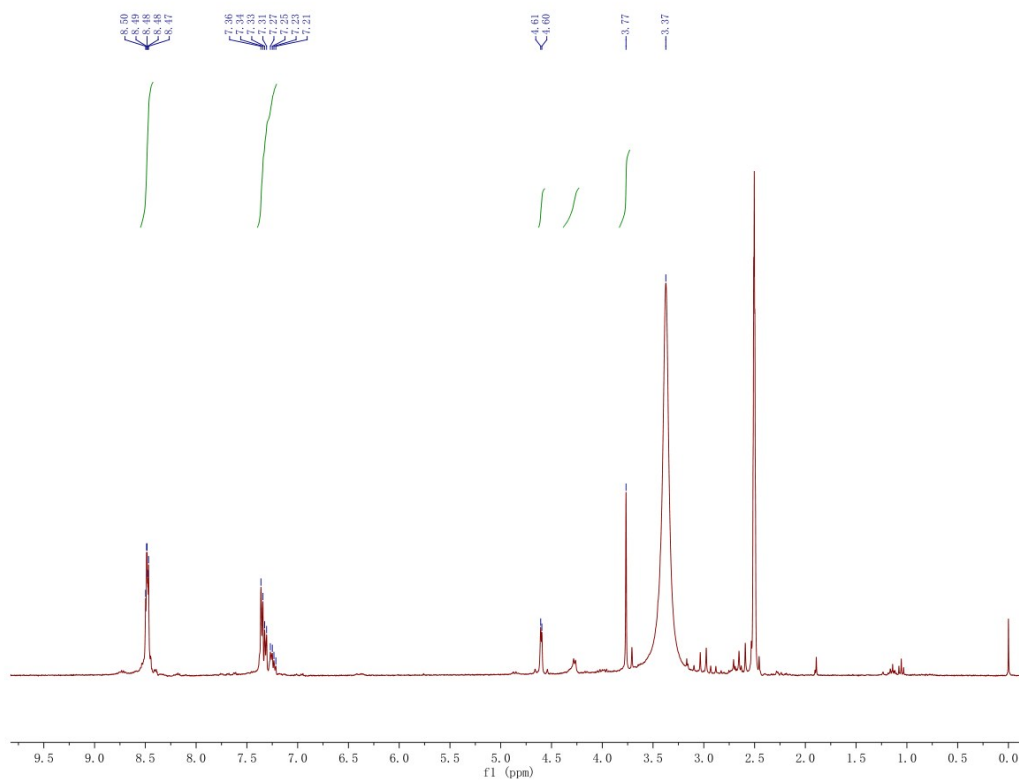

**Fig. S2**  $^1\text{H}$  NMR of CDs-1.

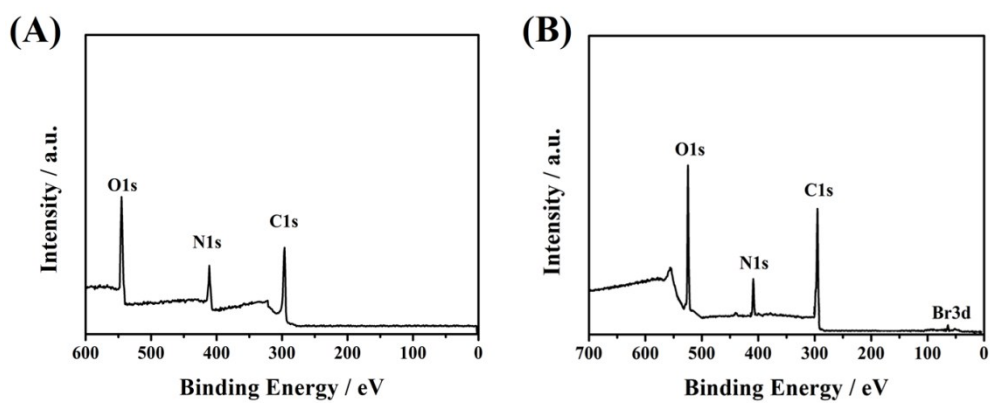

**Fig. S3** XPS survey of (A) CDs-1 and (B) CDs-2.

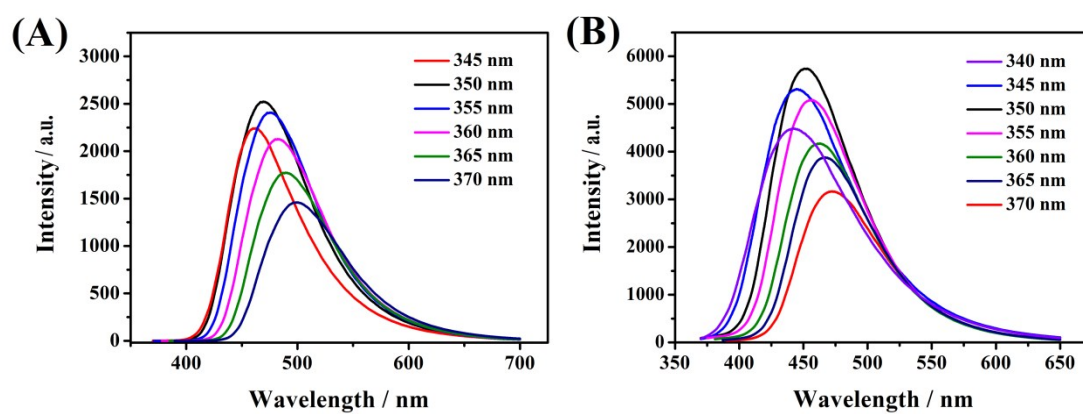

**Fig. S4** Fluorescence spectra of (A) CDs-2 and (B) CDs-3 monitored at different excitation wavelengths.

**Table S1** Parameters of TRF curves for CDs-1, CDs-2, and CDs-3.

|       | $R(t) = B_1 e^{\left(-t/\tau_1\right)} + B_2 e^{\left(-t/\tau_2\right)}$ |                |        |        |          |              |
|-------|--------------------------------------------------------------------------|----------------|--------|--------|----------|--------------|
|       | $\tau_1$                                                                 | $\tau_2$       | $B_1$  | $B_2$  | $\chi^2$ | $\tau_{ave}$ |
| CDs-1 | 15.85 (11.50%)                                                           | 47.23 (88.50%) | 277.46 | 716.10 | 0.91     | 43.62 ns     |
| CDs-2 | 13.59 (8.74%)                                                            | 60.20 (91.26%) | 261.44 | 616.78 | 0.93     | 56.34 ns     |
| CDs-3 | 14.41 (10.09%)                                                           | 59.00 (89.91%) | 304.33 | 662.48 | 0.94     | 54.50 ns     |

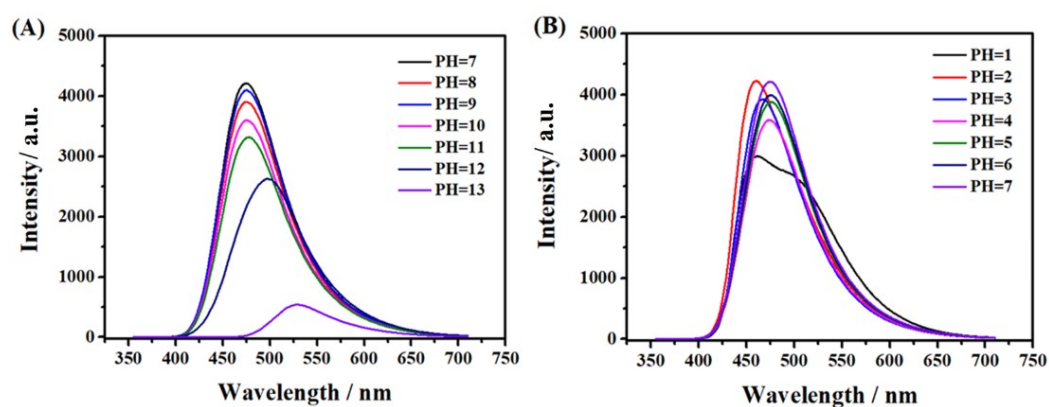

**Fig. S5** Fluorescence spectra of CDs-2 with varying pH including (A) acid solution (pH = 1~7) and (B) basic solution (pH = 7~13).

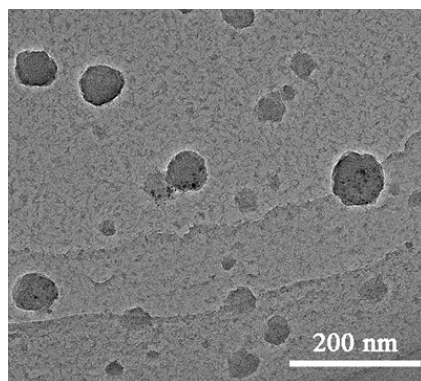

**Fig. S6** TEM image of CDs-3 mixed with  $\text{Fe}^{2+}$ .

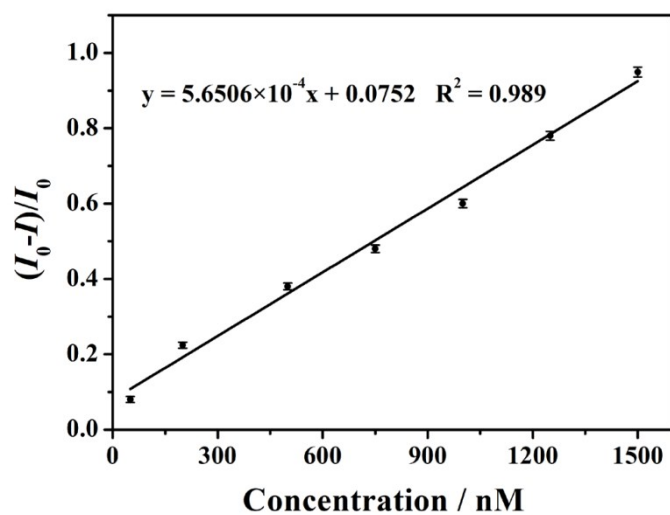

**Fig. S7** Linear relationship of a spot of  $(I_0 - I)/I_0$  versus the concentration of  $\text{Fe}^{2+}$  in the range of 50–1500 nM.
